# Supplementary figures and images for: Effect of the Carbon Support and Conditions on the Carbothermal Synthesis of Cu-Molybdenum Carbide and Its Application on CO2 Hydrogenation to Methanol
Source: MDPI journal article supplement (doi:10.3390/nano12071048), 2022-03-23

## Supplementary Material

**Figure S1.** Raman spectra of the supports.

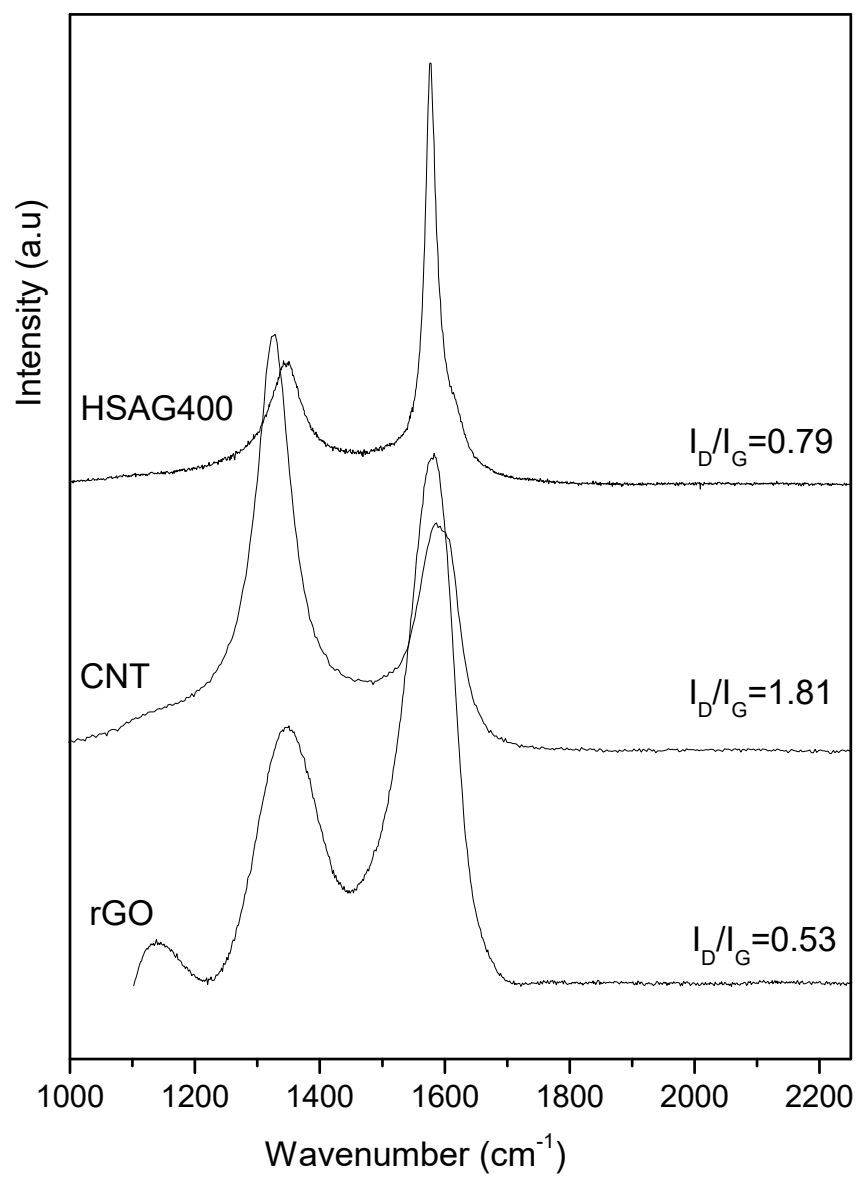

**Figure S2.** CO<sub>2</sub>-TPD supports.

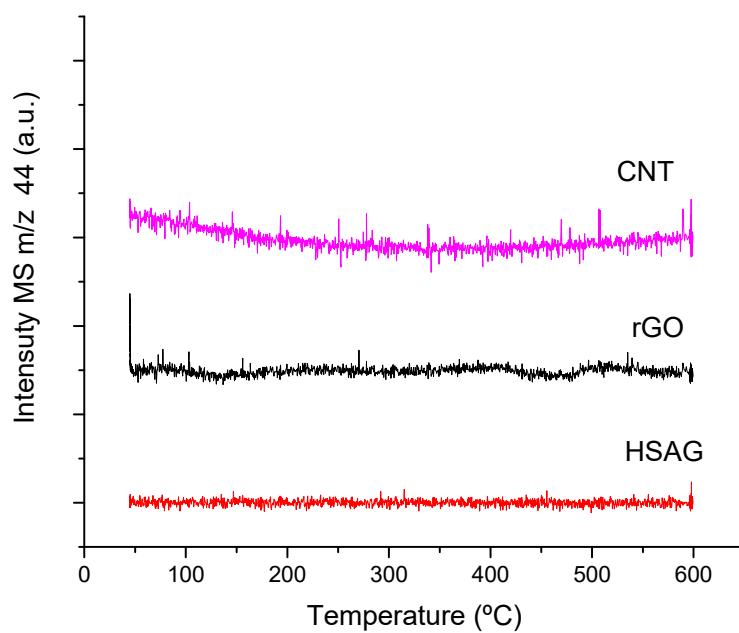

Supplement: s1 [file s1]
